# Supplementary material for: The temporal landscape of recursive splicing during Pol II transcription elongation in human cells
Source: PubMed Central journal article supplement (PMC6110456; doi:10.1371/journal.pgen.1007579), 2018-08-27

**A**

## 435 putative RS sites identified in Sibley et al.

| Filters                                             | Counts    | Percentage |
|-----------------------------------------------------|-----------|------------|
| intron length $\geq 5,000$ nt                       | 230       | 53%        |
| high conservation (PhastCon Score $\geq 0.5$ )      | 113       | 26%        |
| not annotated splice sites                          | 429       | 99%        |
| away from annotated splice site ( $\geq 2,000$ nt)  | 139       | 32%        |
| located in annotated introns                        | 292       | 67%        |
| strong strength as 3' splice site (score $\geq 5$ ) | 395       | 91%        |
| <b>Filtered RS sites</b>                            | <b>20</b> | <b>5%</b>  |

## 20 filtered RS sites by Sibley et al.

| Classified in this study | Putative RS sites | Candidate RS sites | Sawtooth RS sites |
|--------------------------|-------------------|--------------------|-------------------|
| Number of RS sites       | 20                | 12                 | 9                 |

**B**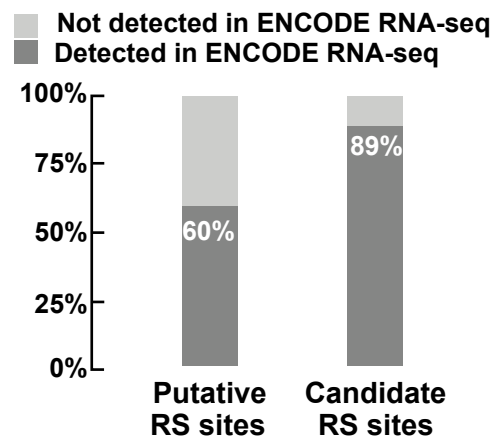**C**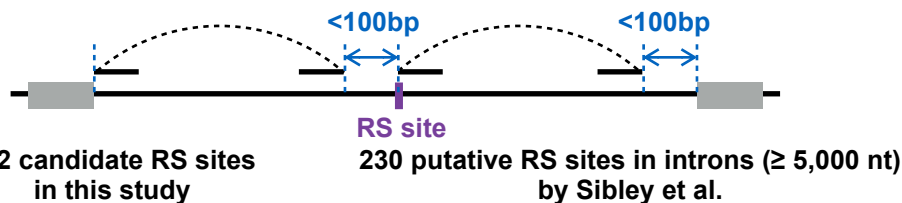

| lariats | lariat reads | RS sites |
|---------|--------------|----------|
| 23      | 266          | 15       |

| lariats | lariat reads | RS sites |
|---------|--------------|----------|
| 15      | 153          | 12       |

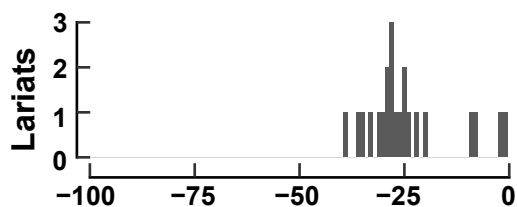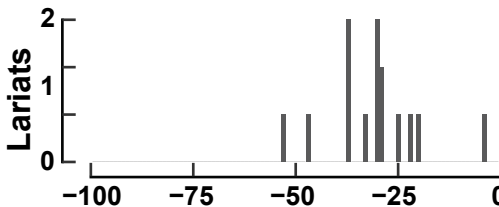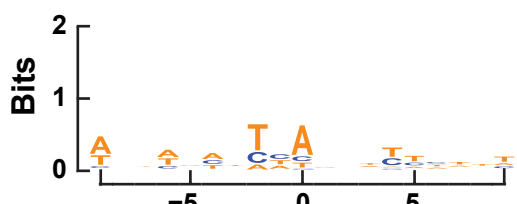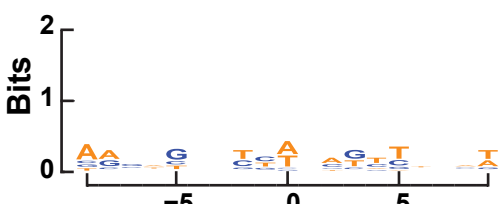

Distance to 3' splice site or BP site

Distance to 3' splice site or BP site

**D**

## Reconstituted 5' splice site of candidate RS sites

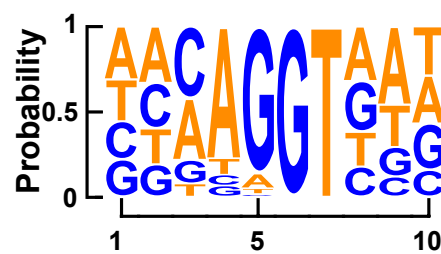

## Reconstituted 5' splice site of sawtooth RS sites

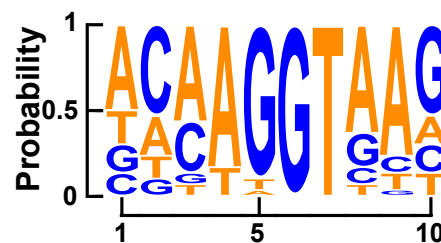

Supplement: pgen.1007579.s004.pdf [file pgen.1007579.s004.pdf]
