# Supplementary material for: The temporal landscape of recursive splicing during Pol II transcription elongation in human cells
Source: PubMed Central journal article supplement (PMC6110456; doi:10.1371/journal.pgen.1007579), 2018-08-27

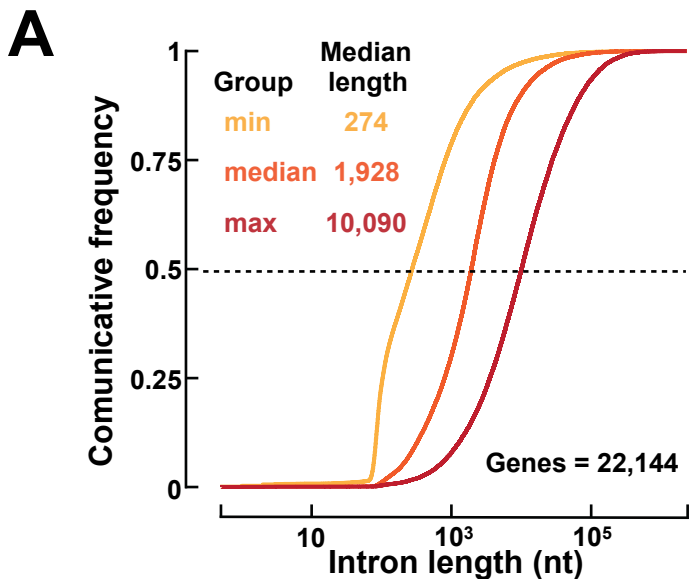

**Maximum intron length in a gene**

| Length (nt) | Number of genes | Percentage |
|-------------|-----------------|------------|
| < 10k       | 11,021          | 50%        |
| 10k ~ 30k   | 5,900           | 27%        |
| 30k ~ 50k   | 1,938           | 9%         |
| 50k ~ 100k  | 1,846           | 8%         |
| 100k ~ 150k | 643             | 3%         |
| ≥150k       | 796             | 3%         |

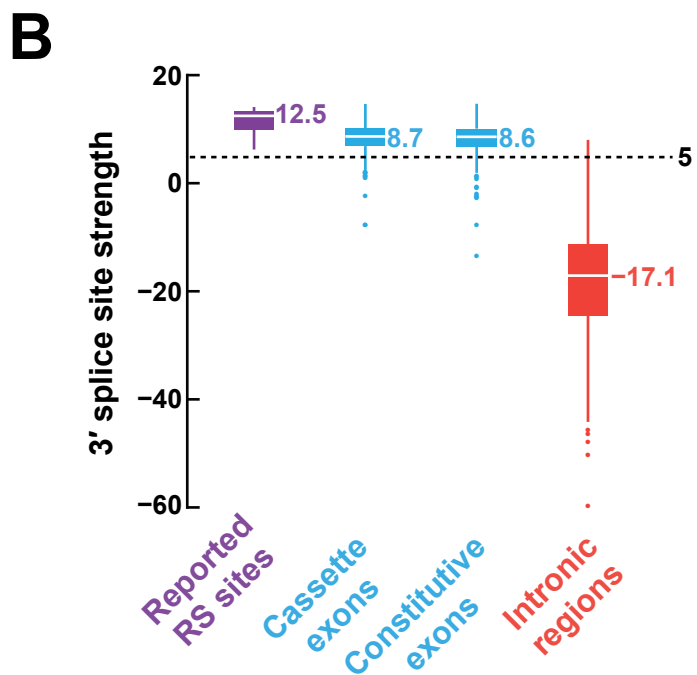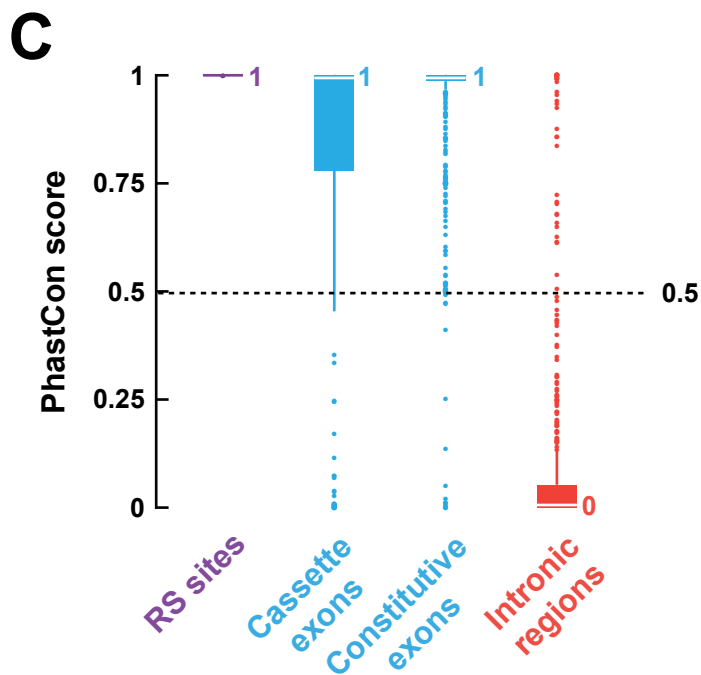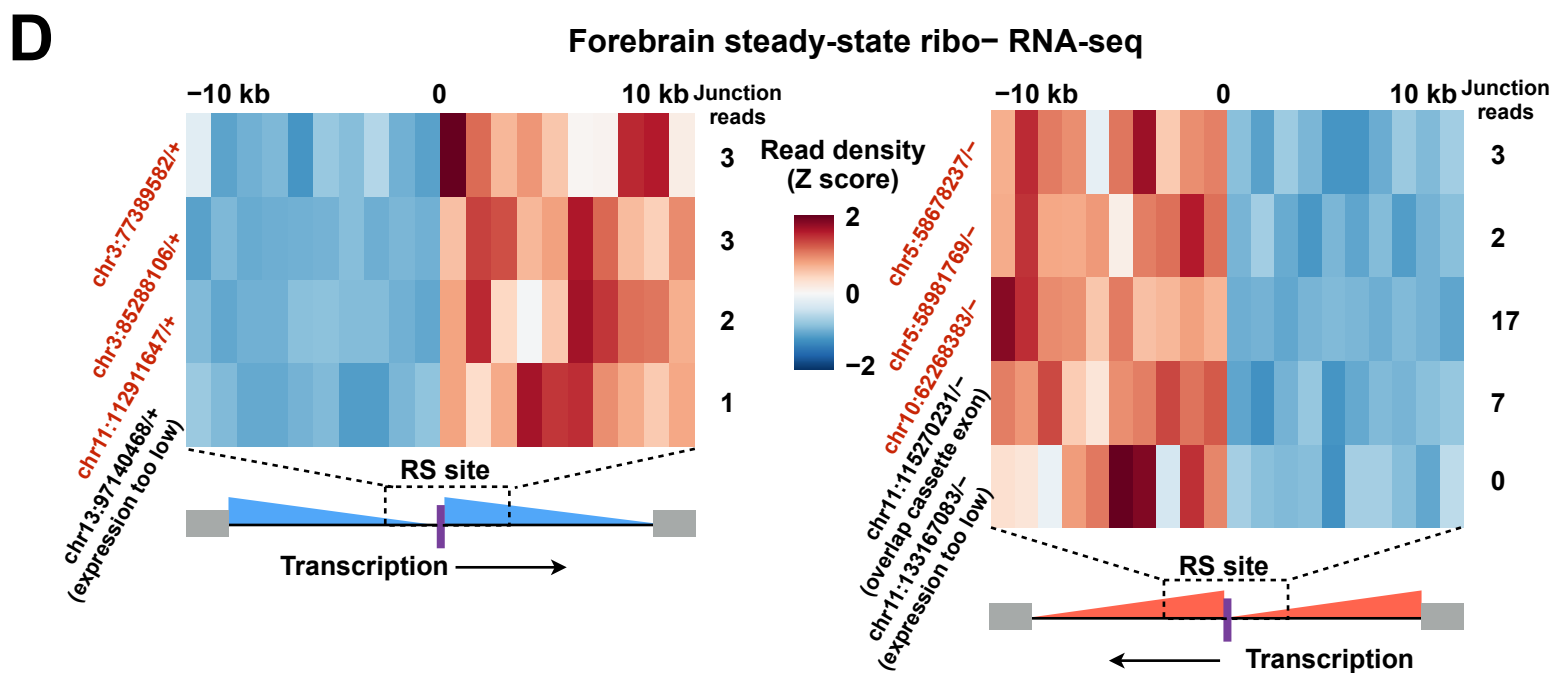

Supplement: pgen.1007579.s001.pdf [file pgen.1007579.s001.pdf]
