# Supplementary material for: The temporal landscape of recursive splicing during Pol II transcription elongation in human cells
Source: PubMed Central journal article supplement (PMC6110456; doi:10.1371/journal.pgen.1007579), 2018-08-27

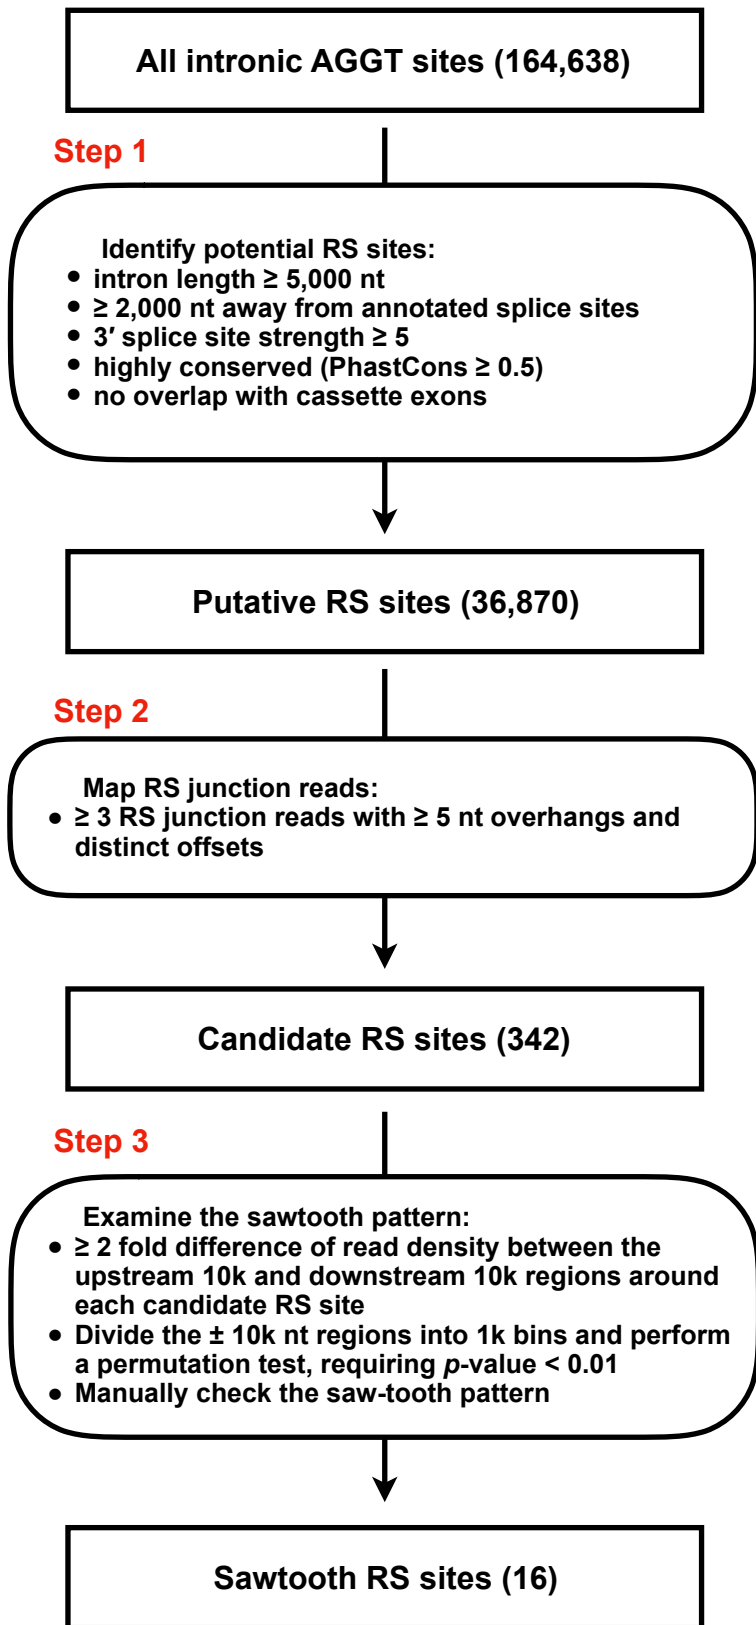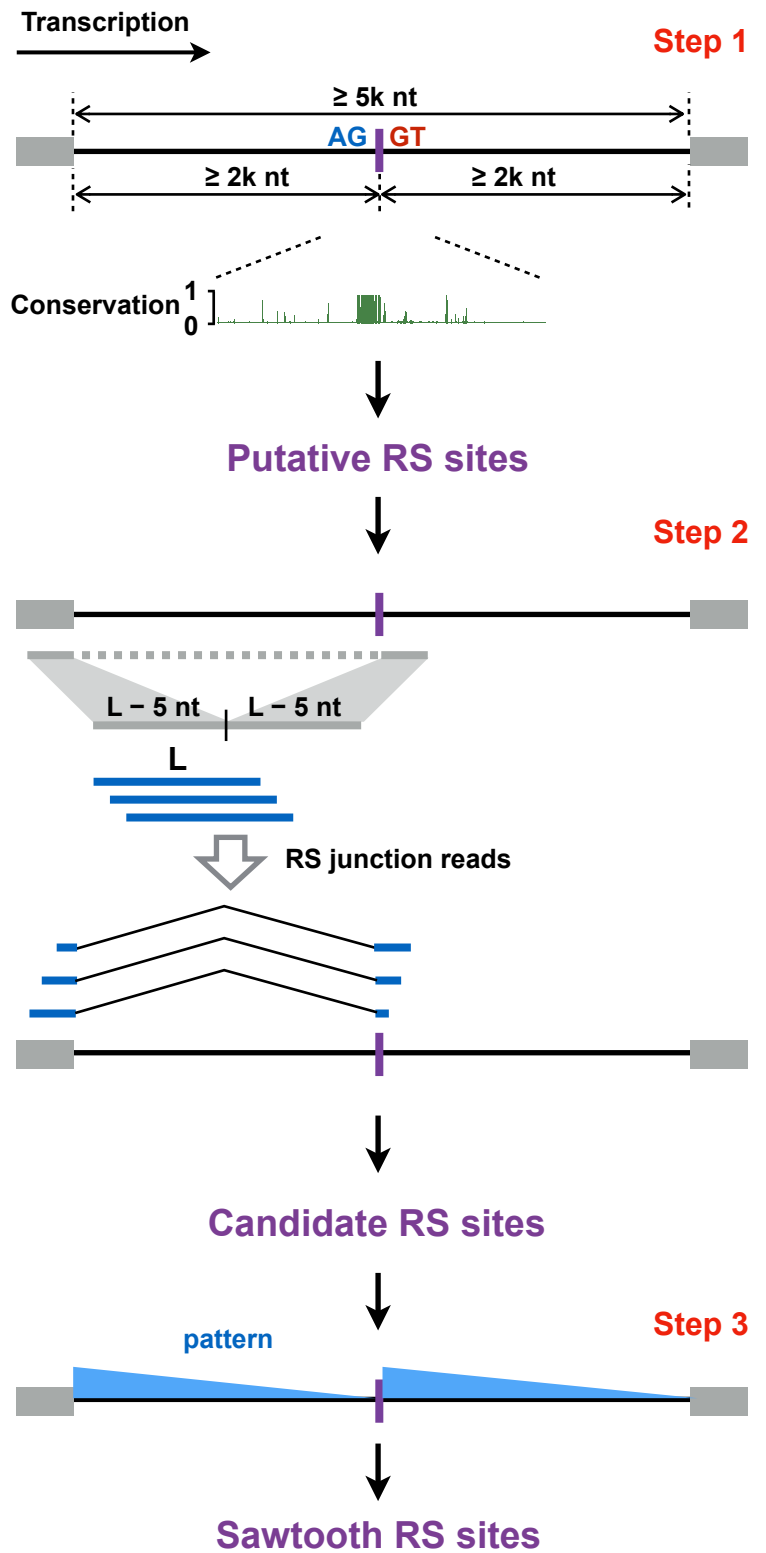

Supplement: pgen.1007579.s002.pdf [file pgen.1007579.s002.pdf]
