# Supplementary material for: The temporal landscape of recursive splicing during Pol II transcription elongation in human cells
Source: PubMed Central journal article supplement (PMC6110456; doi:10.1371/journal.pgen.1007579), 2018-08-27

**A****Sequencing depth**

| Cell line | 10 min     | 15 min     | 30 min      | 60 min      | 120 min     | 4 hr        | 16 hr       | Steady state |
|-----------|------------|------------|-------------|-------------|-------------|-------------|-------------|--------------|
| PA1       | 24,064,138 | 53,660,428 | 96,083,184  | 192,488,809 | 260,122,985 | 386,745,248 | 385,816,787 | 125,735,340  |
| H9        | 25,523,929 | 55,747,344 | 89,718,379  | 104,382,001 | 117,792,209 | -           | -           | 80,698,527   |
| FB        | 20,274,512 | 59,032,425 | 130,880,669 | 286,025,212 | 286,511,613 | -           | -           | 85,335,454   |

**B**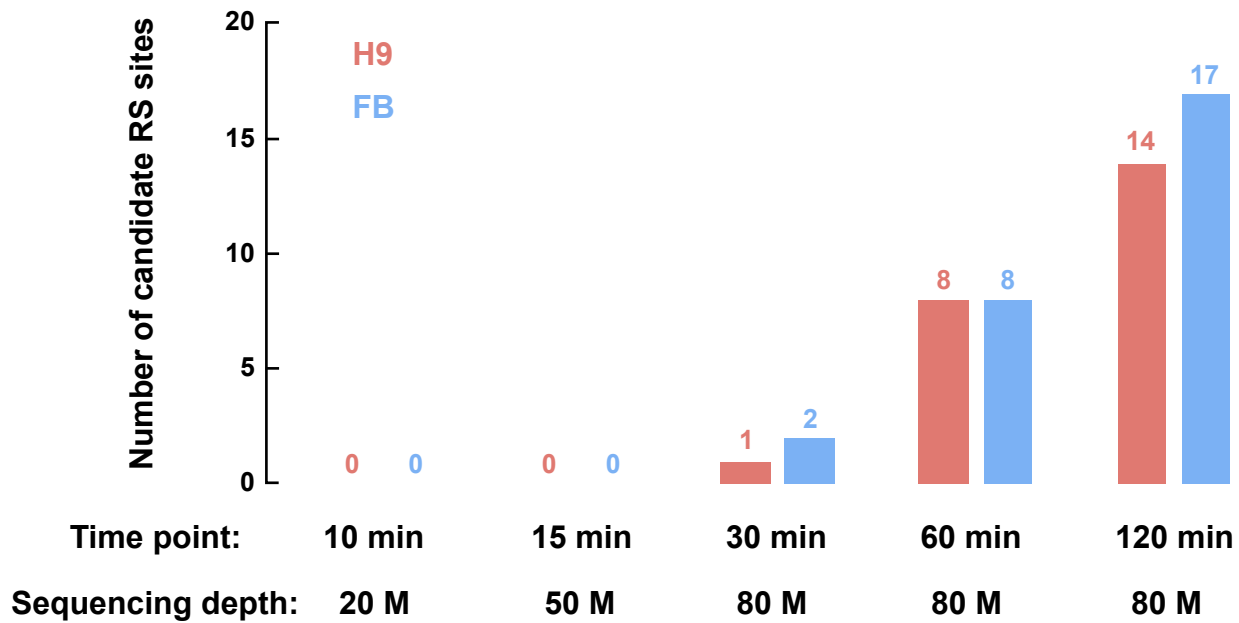**C**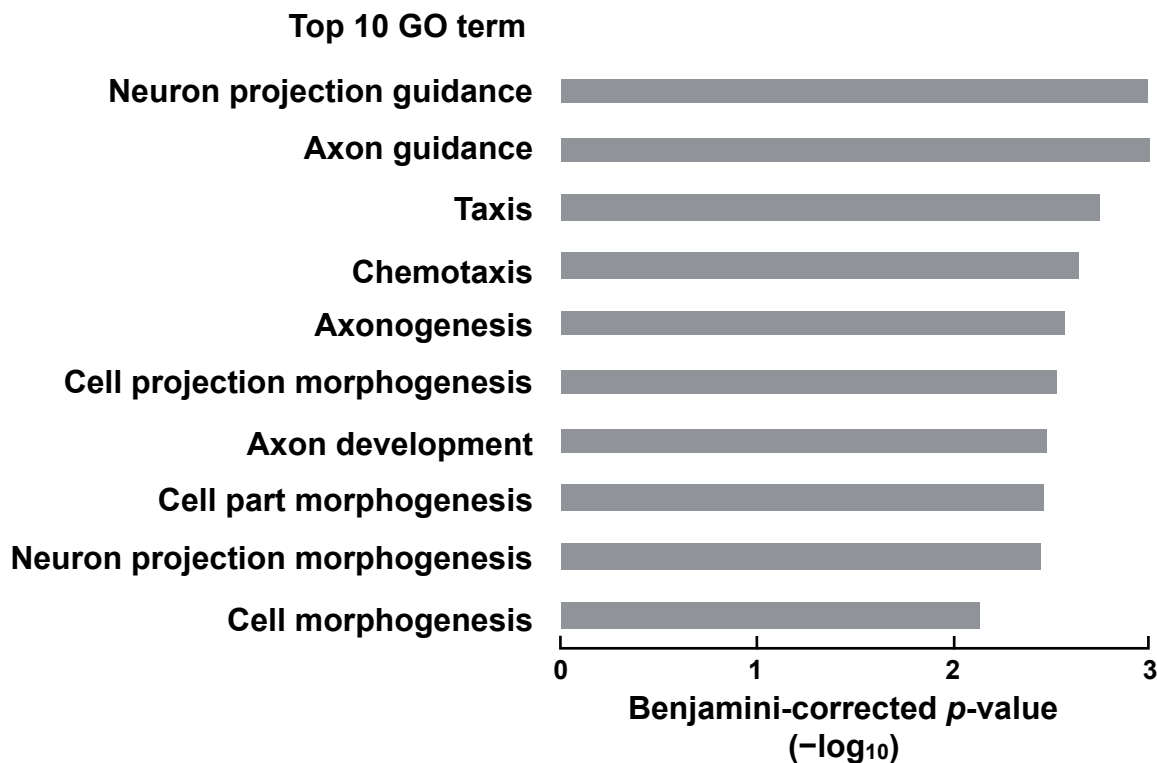

Supplement: pgen.1007579.s003.pdf [file pgen.1007579.s003.pdf]
