# Supplementary material for: The temporal landscape of recursive splicing during Pol II transcription elongation in human cells
Source: PubMed Central journal article supplement (PMC6110456; doi:10.1371/journal.pgen.1007579), 2018-08-27

Time needed by Pol II to transcribe the entire gene

| Time point of RS onset | Post-transcriptional | Undetermined | Co-transcriptional |
|------------------------|----------------------|--------------|--------------------|
| 10 min                 | 0                    | 0~10         | >10                |
| 15 min                 | <10                  | 10~15        | >15                |
| 30 min                 | <15                  | 15~30        | >30                |
| 60 min                 | <30                  | 30~60        | >60                |
| 120 min                | <60                  | 60~120       | >120               |
| 240 min (4 hr)         | <120                 | 120~240      | >240               |
| 960 min (16 hr)        | <240                 | 240~960      | >960               |

**B**

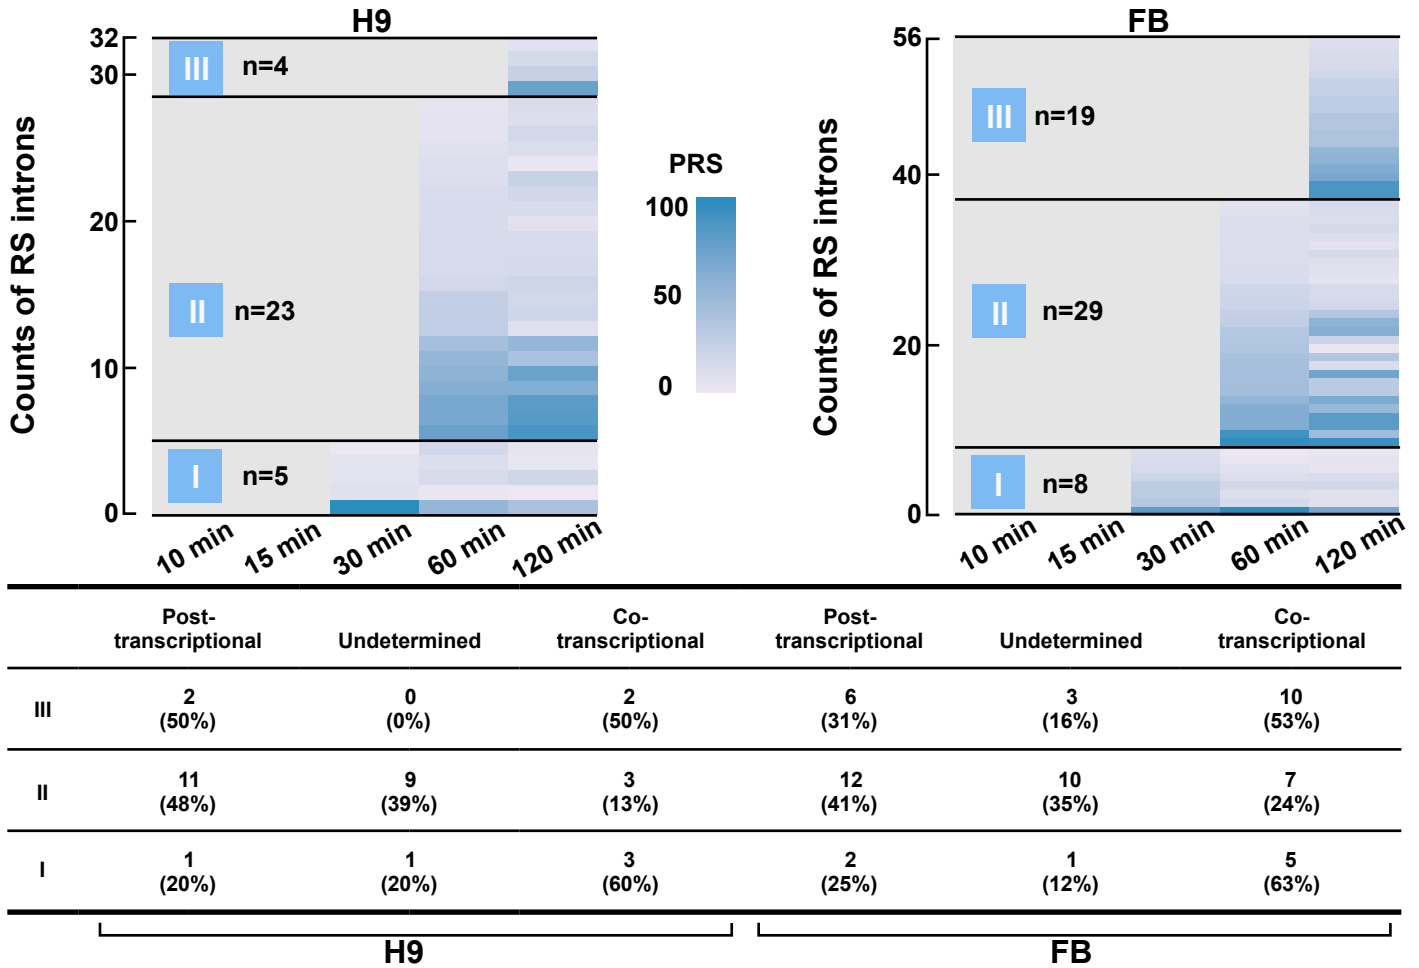

**C**

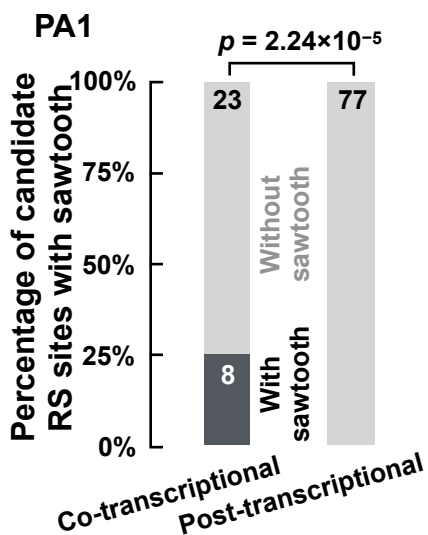

**D**

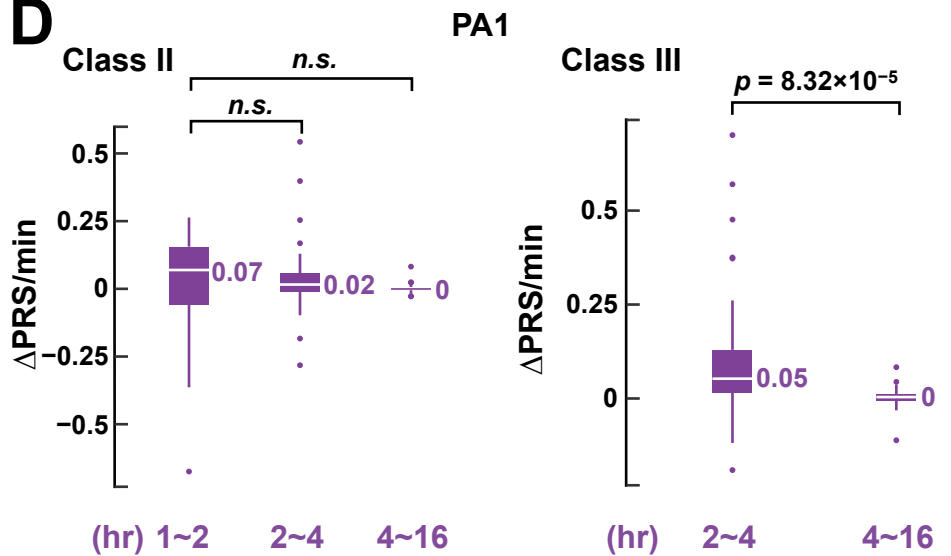

Supplement: pgen.1007579.s007.pdf [file pgen.1007579.s007.pdf]
