# Supplementary material for: The temporal landscape of recursive splicing during Pol II transcription elongation in human cells
Source: PubMed Central journal article supplement (PMC6110456; doi:10.1371/journal.pgen.1007579), 2018-08-27
Supplement: pgen.1007579.s008.pdf [file pgen.1007579.s008.pdf]

**A**

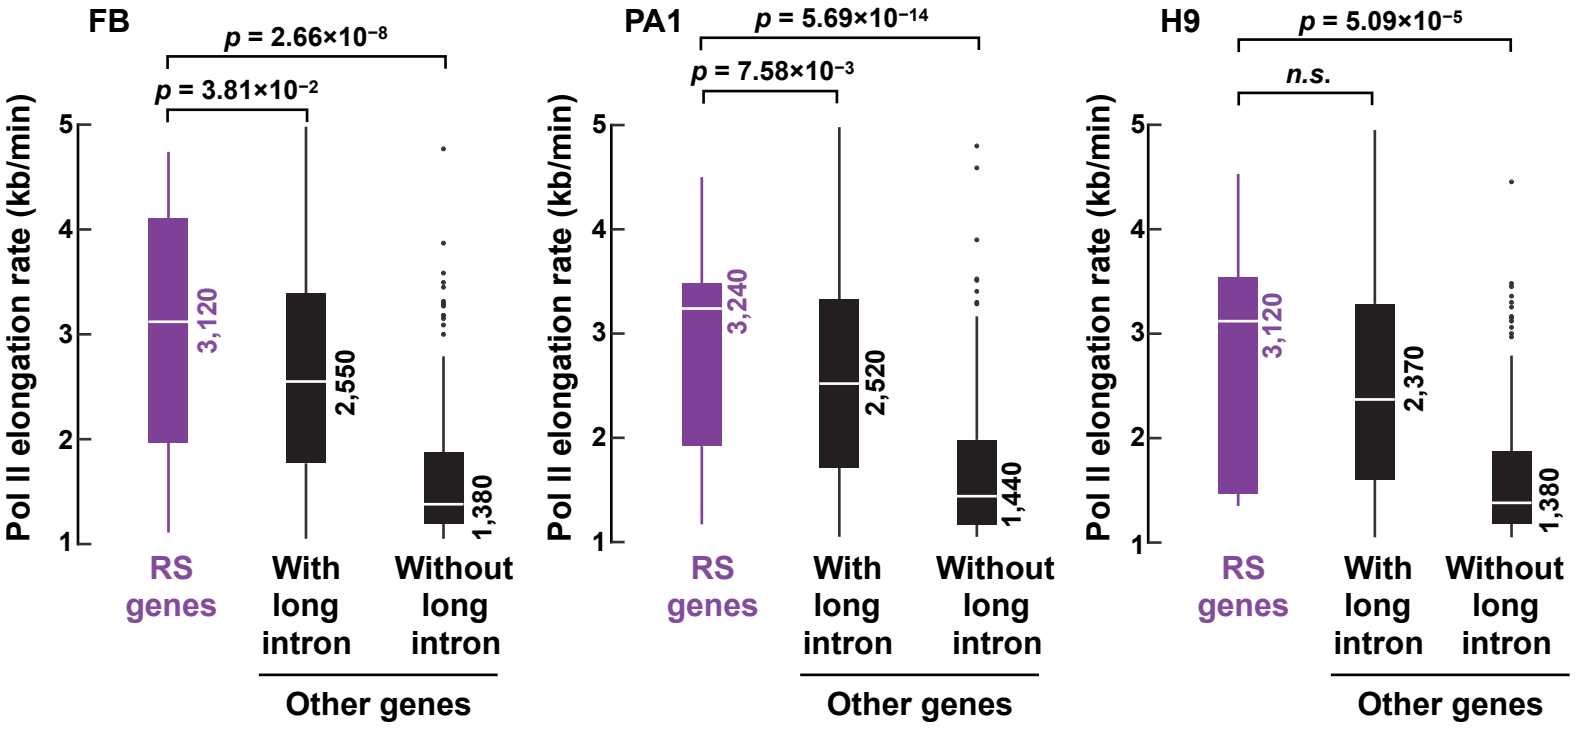

**B**

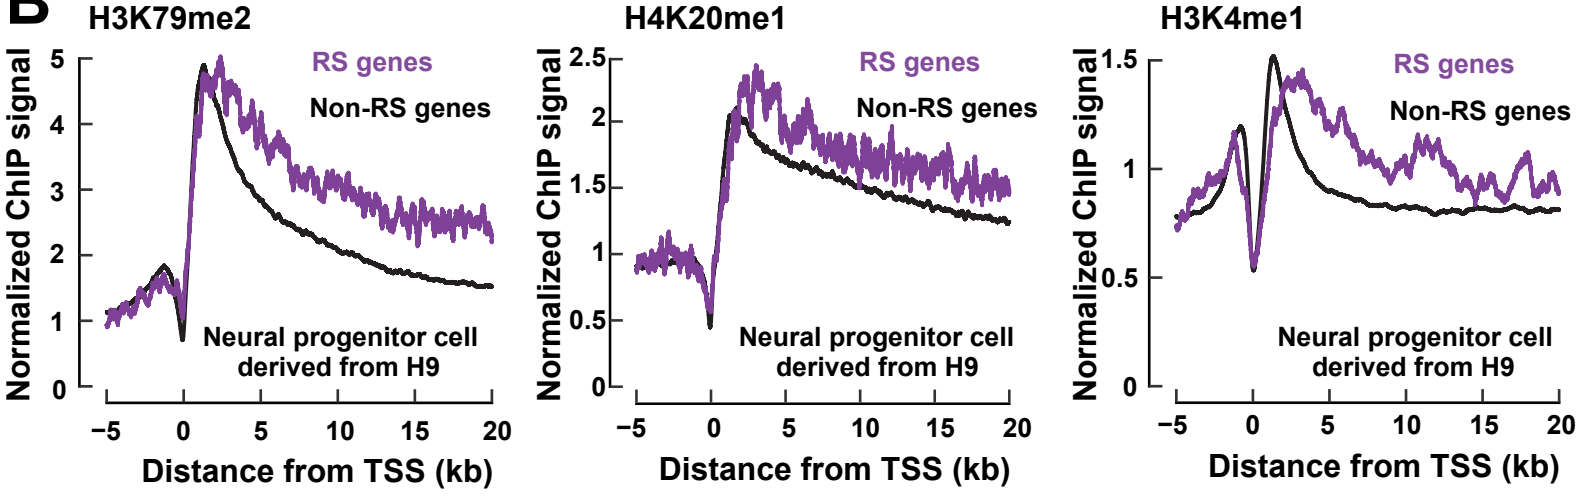

**C**

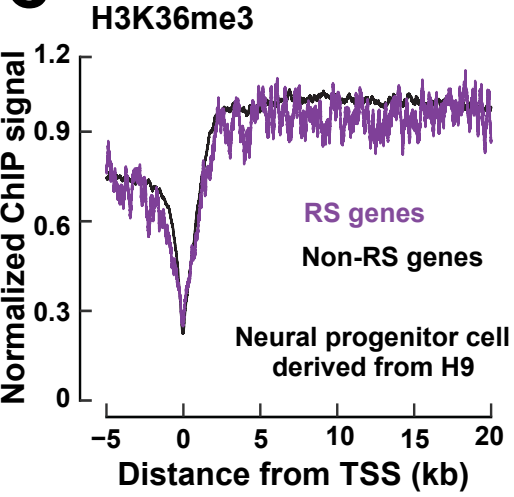

**D**

| Feature                    | FB                                           | PA1                                          | H9                                          |
|----------------------------|----------------------------------------------|----------------------------------------------|---------------------------------------------|
| Length of the first intron | $\nearrow$<br>( $p = 1.58 \times 10^{-2}$ )  | $\nearrow$<br>( $p = 1.47 \times 10^{-10}$ ) | n. s.                                       |
| Exon density               | $\searrow$<br>( $p = 1.02 \times 10^{-10}$ ) | $\searrow$<br>( $p = 1.45 \times 10^{-18}$ ) | $\searrow$<br>( $p = 3.13 \times 10^{-3}$ ) |
| Simple repeats             | $\nearrow$<br>( $p = 1.14 \times 10^{-2}$ )  | $\nearrow$<br>( $p = 4.02 \times 10^{-4}$ )  | $\nearrow$<br>( $p = 1.57 \times 10^{-2}$ ) |
| GC content                 | $\searrow$<br>( $p = 5.17 \times 10^{-3}$ )  | n. s.                                        | $\searrow$<br>( $p = 2.93 \times 10^{-2}$ ) |

$\nearrow$ : RS genes > Non-RS genes;  $\searrow$ : RS genes < Non-RS genes; n. s.: not statistically significant
