# Supplementary material for: The temporal landscape of recursive splicing during Pol II transcription elongation in human cells
Source: PubMed Central journal article supplement (PMC6110456; doi:10.1371/journal.pgen.1007579), 2018-08-27
Supplement: pgen.1007579.s009.pdf [file pgen.1007579.s009.pdf]

**A**

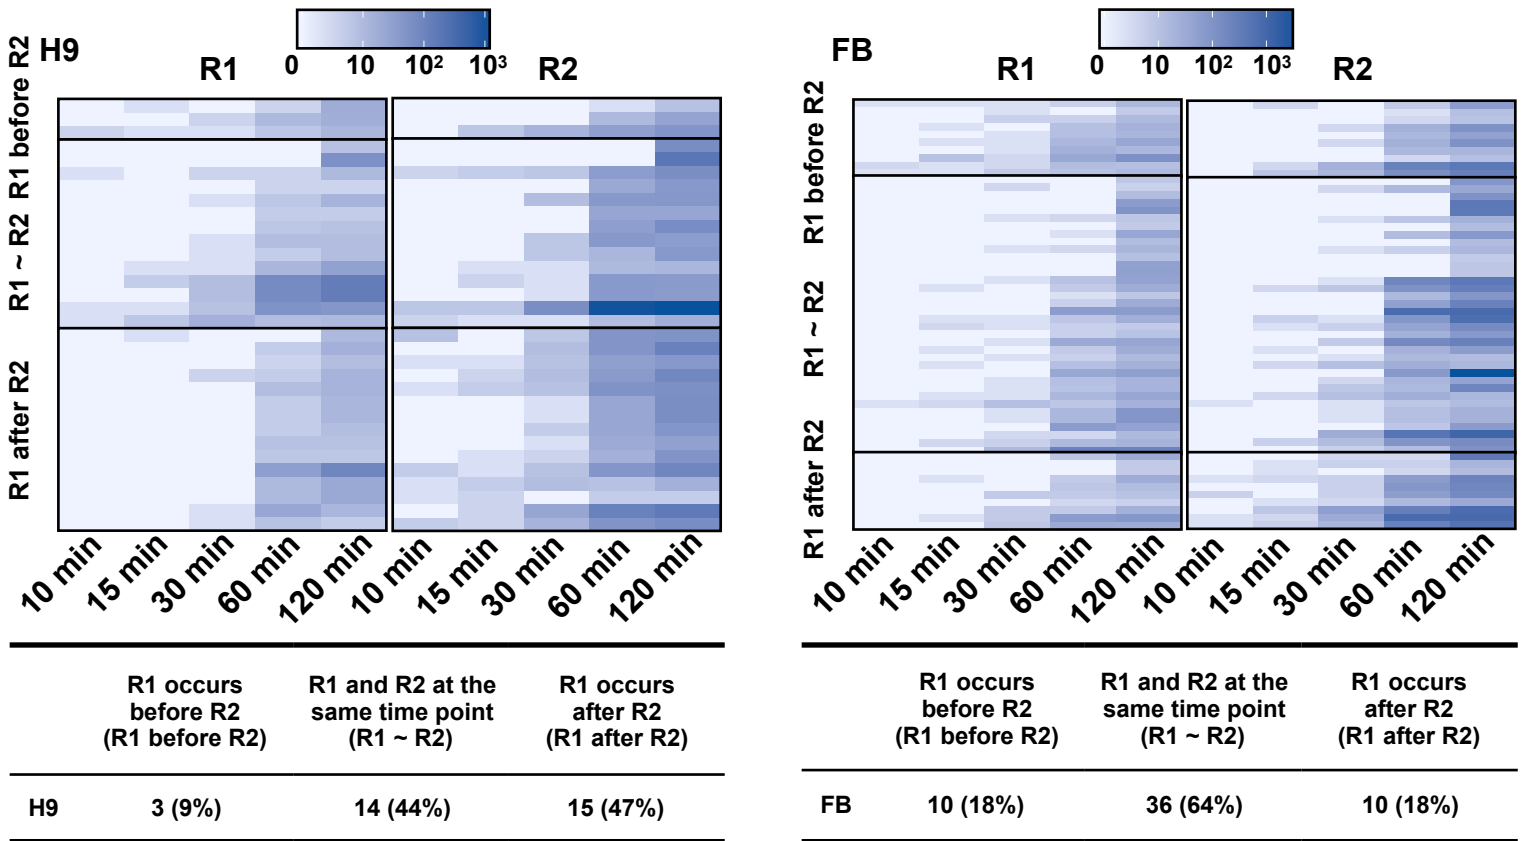

**B**

| 327 RS introns in PA1            | With full length lariats in PA1 | Without full length lariats in PA1 | With full length lariats in other cells | Without full length lariats in other cells |
|----------------------------------|---------------------------------|------------------------------------|-----------------------------------------|--------------------------------------------|
| With recursive lariats in PA1    | 0                               | 9                                  | 1                                       | 8                                          |
| Without recursive lariats in PA1 | 12                              | 306                                | 33                                      | 285                                        |

  

| 82 RS introns in H9             | With full length lariats in H9 | Without full length lariats in H9 | With full length lariats in other cells | Without full length lariats in other cells |
|---------------------------------|--------------------------------|-----------------------------------|-----------------------------------------|--------------------------------------------|
| With recursive lariats in H9    | 1                              | 1                                 | 1                                       | 1                                          |
| Without recursive lariats in H9 | 2                              | 78                                | 8                                       | 72                                         |

  

| 129 RS introns in FB            | With full length lariats in FB | Without full length lariats in FB | With full length lariats in other cells | Without full length lariats in other cells |
|---------------------------------|--------------------------------|-----------------------------------|-----------------------------------------|--------------------------------------------|
| With recursive lariats in FB    | 0                              | 0                                 | 0                                       | 0                                          |
| Without recursive lariats in FB | 5                              | 124                               | 15                                      | 114                                        |
